# Supplementary material
Source: PubMed Central journal article supplement (PMC3910505)

## Supplementary Online Content

Feng X, Han D, Kilaru BK, Franek BS, Niewold TB, Reder AT. Inhibition of interferon-beta responses in multiple sclerosis immune cells associated with high-dose statins. *Arch Neurol*. 2012. doi:10.1001/archneurol.2012.465.

**eFigure 1. Interferon-beta induces P-Y-STAT1 and atorvastatin inhibits this interferon induction in Jurkat T cells.**

**eFigure 2. Atorvastatin dose dependently inhibits interferon- $\beta$  stimulation in therapy-naive patients with relapsing-remitting multiple sclerosis.**

This supplementary material has been provided by the authors to give readers additional information about their work.

eFigure 1. Interferon-beta (IFN- $\beta$ ) induces P-Y-STAT1 and atorvastatin inhibits this IFN induction in Jurkat T cells. A, 45-minute exposure to different doses of ( $\blacklozenge$ ) Avonex, ( $\bullet$ ) Betaseron, ( $\blacktriangle$ ) Rebif. B, 24-hour preincubation with atorvastatin (0, 1, 5, 10, 20  $\mu$ M), then IFN- $\beta$  (160 U/mL). Representative of 6 experiments.

Supplemental Figure 1

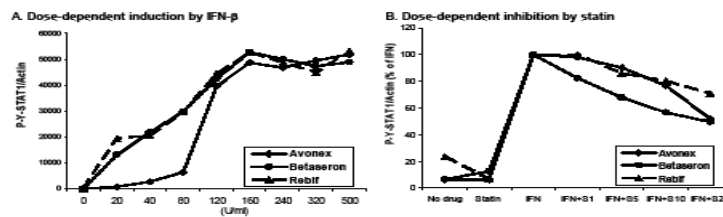

eFigure 2. Atorvastatin dose dependently inhibits interferon- $\beta$  (IFN- $\beta$ ) stimulation in therapy-naive patients with relapsing-remitting multiple sclerosis. A, P-Y-STAT1 formation in mononuclear cells preincubated with atorvastatin (0, 1, 5, and 10  $\mu$ M) for 15 minutes to 24 hours, then stimulated with IFN- $\beta$ -1b (160 U/mL) for 45 minutes. B, Protein induction by IFN- $\beta$  and IFN- $\gamma$  (100 U/mL) stimulation after 24-hour preincubation with atorvastatin (10  $\mu$ M). Representative of 21 experiments.

Supplemental Figure 2

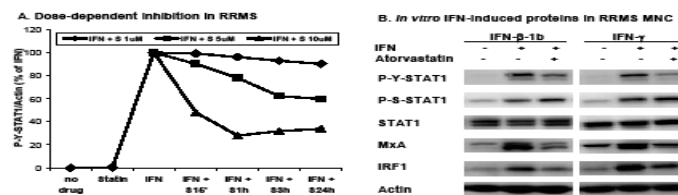

Supplement: NIHMS547614-supplement-Supplemental_Figures.pdf [file NIHMS547614-supplement-Supplemental_Figures.pdf]
